# Supplementary material for: Stamping Nanoparticles onto the Electrode for Rapid Electrochemical Analysis in Microfluidics
Source: Micromachines (Basel). 2021 Jan 6;12(1):60. doi: 10.3390/mi12010060 (PMC7825540; doi:10.3390/mi12010060)
Supplement: Supplementary file 1 [file micromachines-12-00060-s001.pdf]

# Stamping nanoparticles onto the electrode for rapid electrochemical analysis in microfluidics

Jiyoung Son<sup>1</sup>, Edgar Buck,<sup>2</sup> Shawn Riechers,<sup>2</sup> and Xiao-Ying Yu<sup>1,\*</sup>

<sup>1</sup> Energy and Environment Directorate, Pacific Northwest National Laboratory, Richland, WA 99354; jiyoung.son@pnnl.gov, edgar.buck@pnnl.gov, shawn.riechers@pnnl.gov, xiaoying.yu@pnnl.gov

<sup>2\*</sup> Correspondence: xiaoying.yu@pnnl.gov; Tel.: +01-509-372-4524 (X.-Y. Y.)

## Table of Contents

|                                                                                                                                                                                                                                                                                                              |      |
|--------------------------------------------------------------------------------------------------------------------------------------------------------------------------------------------------------------------------------------------------------------------------------------------------------------|------|
| Supplemental Figures.....                                                                                                                                                                                                                                                                                    | S-1  |
| <b>Figure. S1.</b> ToF-SIMS Spectral plots from the stamped SiN window: (a) surface spectrum of the SiN membrane with CeO <sub>2</sub> sequence stamping and (b) surface spectrum of the SiN membrane with graphite applied by mixed stamping. ....                                                          | S-1  |
| <b>Figure. S2.</b> ToF-SIMS 2D images and a spectrum plot of the CeO <sub>2</sub> mix stamped on SiN membrane, (a) SIMS 2D image of the Ce <sup>+</sup> , (b) CeO <sup>+</sup> , and (c) spectral plot showing Ce <sup>+</sup> ion related peaks.....                                                        | S-2  |
| <b>Figure S3.</b> ToF-SIMS 2D images and a spectrum plot of the CeO <sub>2</sub> droplet stamped on SiN membrane, SIMS 2D image of Ce <sup>+</sup> (a) spectral plot showing Ce <sup>+</sup> ion related peaks. ....                                                                                         | S-3  |
| <b>Figure. S4.</b> ToF-SIMS 2D images and a spectrum plot of the graphite sequence stamped on SiN membrane, SIMS 2D image of the C <sub>4</sub> H <sub>10</sub> <sup>+</sup> (a) and C <sub>5</sub> H <sub>9</sub> <sup>+</sup> (b), and (c) spectral plot showing graphite fragment related peaks. ....     | S-4  |
| <b>Figure. S5.</b> ToF-SIMS 2D images and a spectrum plot of the graphite droplet stamped on SiN membrane, (a) SIMS 2D image of the C <sub>4</sub> H <sub>10</sub> <sup>+</sup> and (b) C <sub>5</sub> H <sub>9</sub> <sup>+</sup> , and (c) spectral plot showing graphite fragment ion related peaks. .... | S-5  |
| <b>Figure. S6.</b> Optical image of silver epoxy stamped SiN membrane and Cyclic Voltammetry (CV) scan of the silver epoxy control device of 50 x (a) and 200 x (b) magnification, and (c) CV scan plot.....                                                                                                 | S-6  |
| <b>Figure. S7.</b> Optical image of blank SiN membrane with Au electrode and CV scan of the blank control device of 50 x (a) and 200 x (b) magnification, and (c) CV scan plot. ....                                                                                                                         | S-7  |
| <b>Figure. S8.</b> CV scans of a sequence stamp device with different scan rates, i.e., 40 mV/s, 80 mV/s, and 100 mV/s. ....                                                                                                                                                                                 | S-8  |
| <b>Figure. S9.</b> Comparison of CV scan of the two sequence stamp devices using the scan rate of 100 mV/s: (a) the same device as shown in the main test and (b) a different device.....                                                                                                                    | S-8  |
| <b>Figure. S10.</b> CV scans of a mix stamp device with different scan rates, i.e., 60 mV/s, 80 mV/s, and 100 mV/s. ....                                                                                                                                                                                     | S-9  |
| <b>Figure. S11.</b> Comparison of CV scan of the two mix stamp devices using the scan rate of 100 mV/s: (a) the same device as shown in the main test and (b) a different device.....                                                                                                                        | S-9  |
| <b>Figure. S12.</b> CV scans of a droplet stamp device with different scan rates, i.e., 60 mV/s, 80 mV/s, and 100 mV/s. ....                                                                                                                                                                                 | S-10 |
| <b>Figure. S13.</b> Comparison of CV scan of the two droplet stamp devices using the scan rate of 100 mV/s: (a) the same device as shown in the main test and (b) a different device.....                                                                                                                    | S-10 |

## Supplement Information

Additional experimental details, figures, and tables are provided to support the content in the main text.

### Supplemental Figures

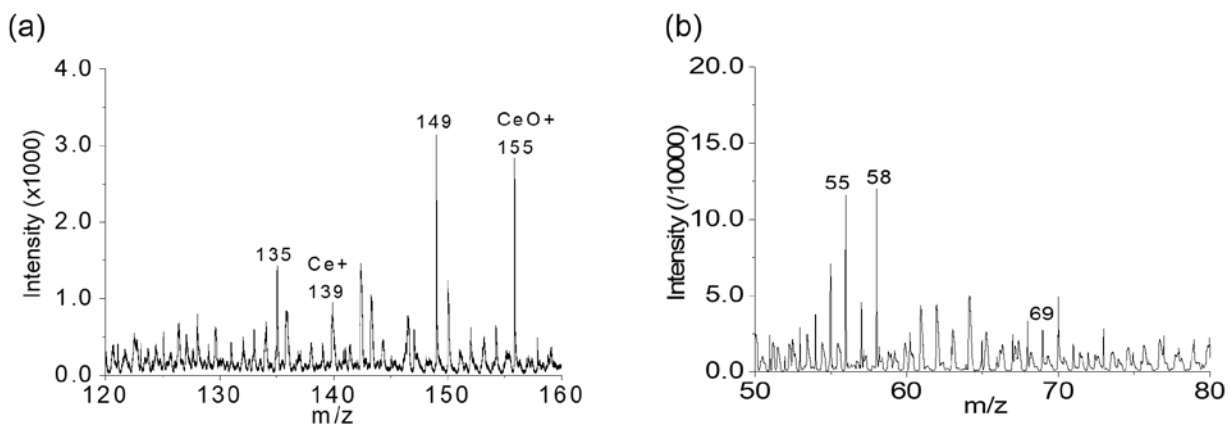

**Figure. S1.** ToF-SIMS Spectral plots from the stamped SiN window: (a) surface spectrum of the SiN membrane with CeO<sub>2</sub> sequence stamping and (b) surface spectrum of the SiN membrane with graphite applied by mixed stamping.

Figure S1 depicts ToF-SIMS spectral showing mass fragment peaks of targeted nanoparticles, Ce<sup>+</sup> m/z<sup>+</sup> 139.9178 and CeO<sup>+</sup> m/z<sup>+</sup> 155.8964 show cerium fragment peaks from the CeO<sub>2</sub> nanoparticle (Figure S1a). Fewer significant numbers were used in the spectra due to space constraints. Figure S1b shows graphite fragment peaks C<sub>4</sub>H<sub>10</sub><sup>+</sup> m/z<sup>+</sup> 58.0604 and C<sub>5</sub>H<sub>8</sub><sup>+</sup> m/z<sup>+</sup> 69.0462, and both are previously reported in graphite electrode studies [1, 2].

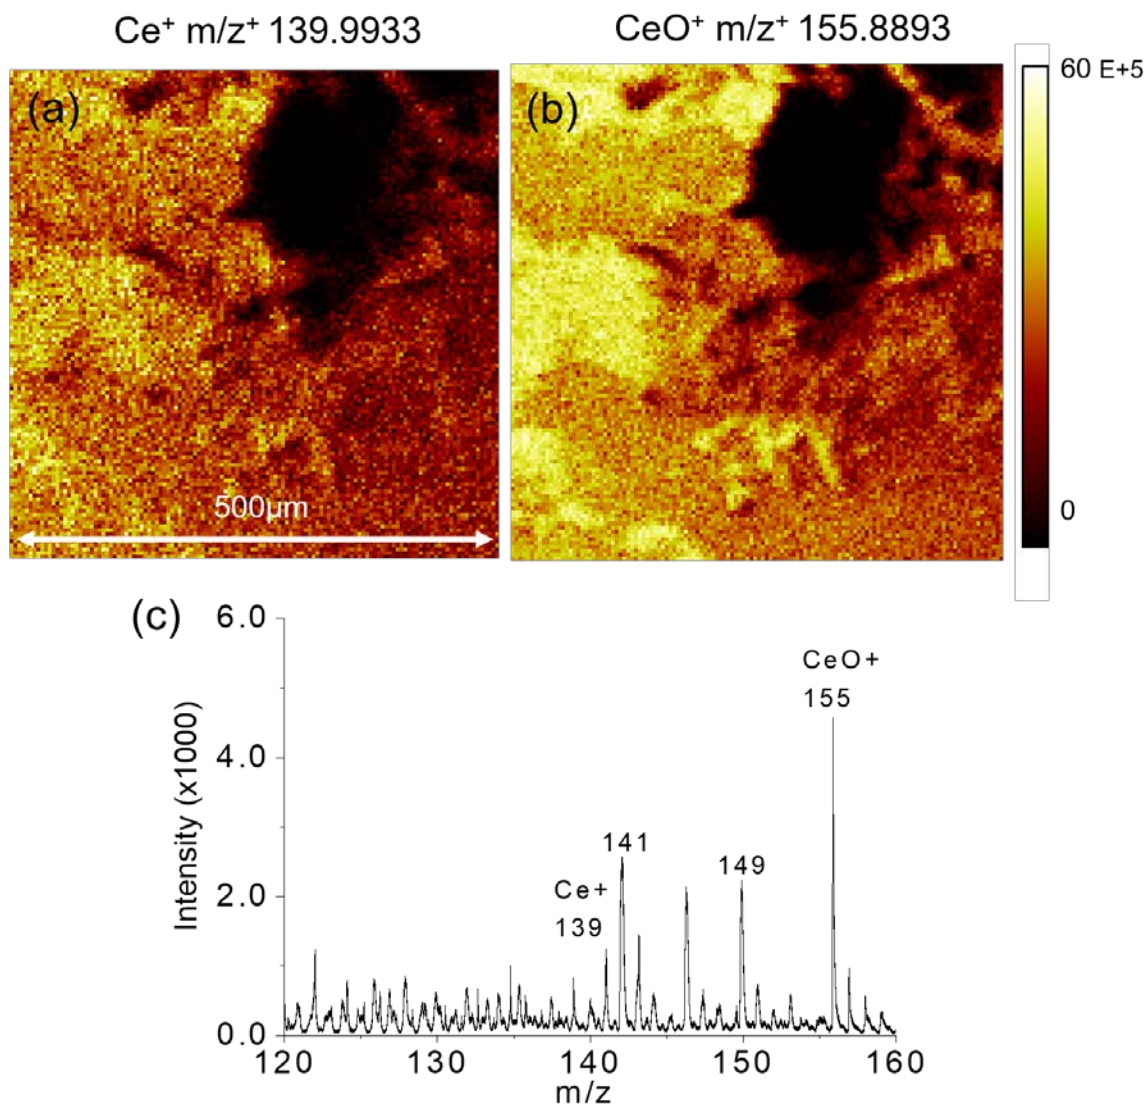

**Figure. S2.** ToF-SIMS 2D images and a spectrum plot of the  $\text{CeO}_2$  mix stamped on SiN membrane, **(a)** SIMS 2D image of the  $\text{Ce}^+$ , **(b)**  $\text{CeO}^+$ , and **(c)** spectral plot showing  $\text{Ce}^+$  ion related peaks.

Fewer significant numbers were used in the spectra due to space constraints.

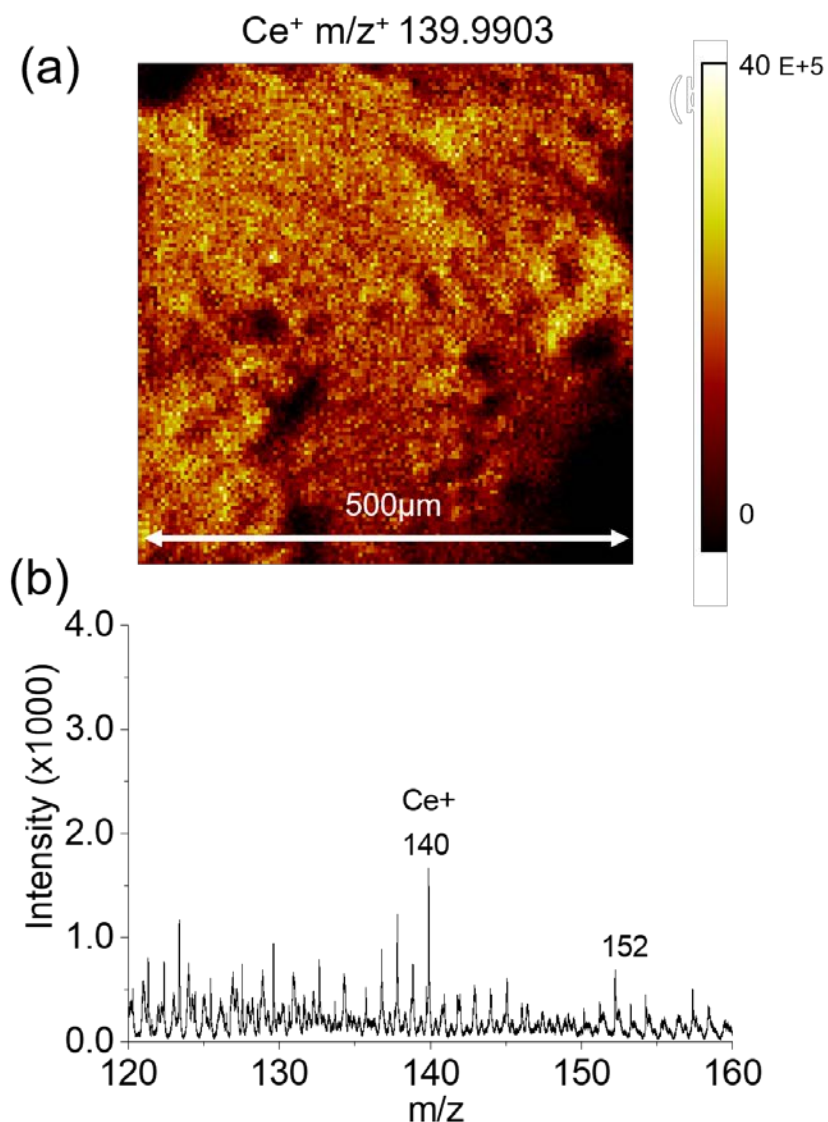

**Figure S3.** ToF-SIMS 2D images and a spectrum plot of the  $\text{CeO}_2$  droplet stamped on SiN membrane, SIMS 2D image of  $\text{Ce}^+$ (a) spectral plot showing  $\text{Ce}^+$  ion related peaks.

Note that the  $\text{Ce}^+ m/z^+ 139.9178$  peak has different ion counts as  $\text{Ce}^+$  in the [Figure S3c](#) spectral plot because the sample surface is not as smooth. Fewer significant numbers were used in the spectra due to space constraints.

# Supplement Information

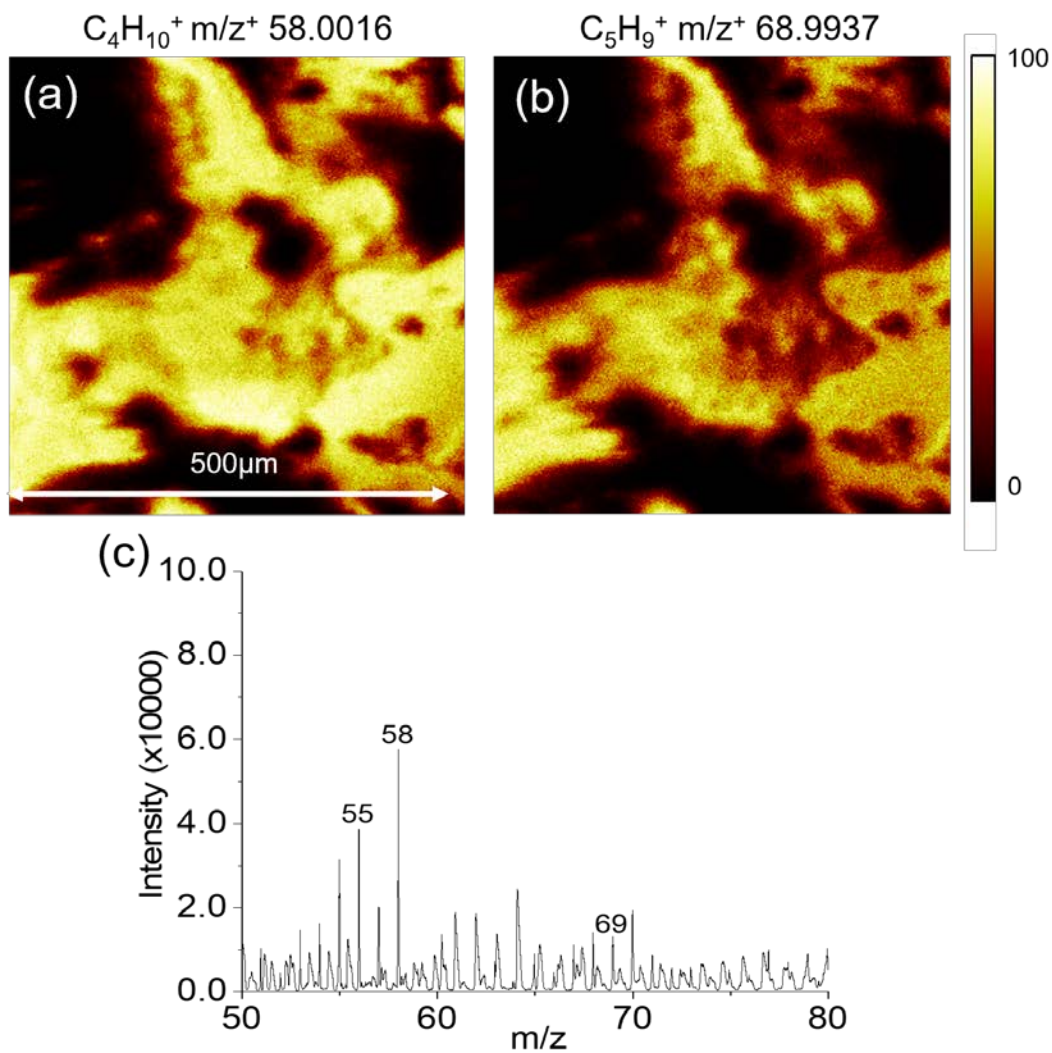

**Figure. S4.** ToF-SIMS 2D images and a spectrum plot of the graphite sequence stamped on SiN membrane, SIMS 2D image of the  $\text{C}_4\text{H}_{10}^+$  (a) and  $\text{C}_5\text{H}_9^+$  (b), and (c) spectral plot showing graphite fragment related peaks.

Fewer significant numbers were used in the spectra due to space constraints.

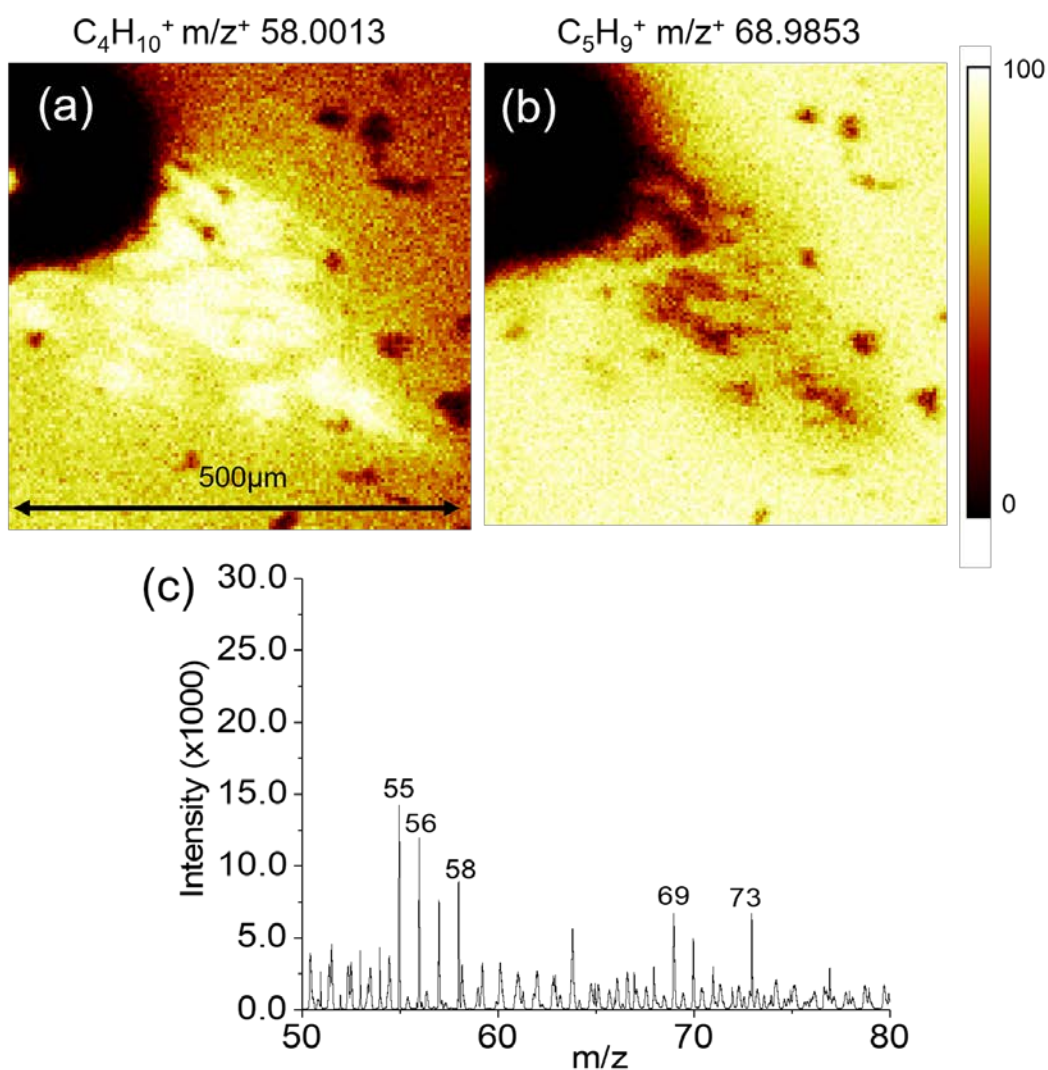

**Figure. S5.** ToF-SIMS 2D images and a spectrum plot of the graphite droplet stamped on SiN membrane, (a) SIMS 2D image of the  $C_4H_{10}^+$  and (b)  $C_5H_9^+$ , and (c) spectral plot showing graphite fragment ion related peaks.

Fewer significant numbers were used in the spectra due to space constraints.

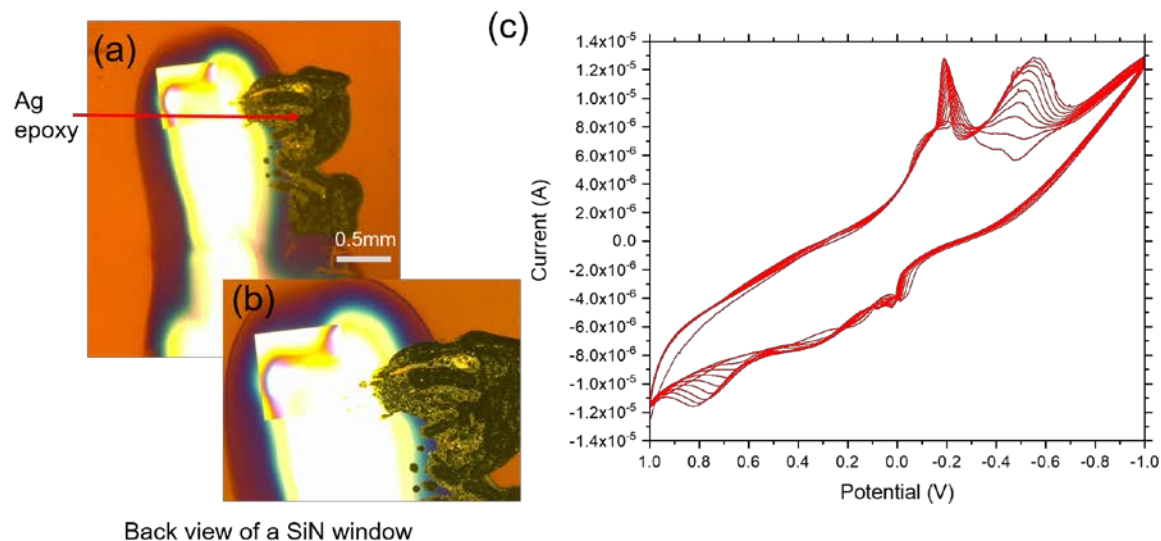

**Figure. S6.** Optical image of silver epoxy stamped SiN membrane and Cyclic Voltammetry (CV) scan of the silver epoxy control device of 50 x (a) and 200 x (b) magnification, and (c) CV scan plot.

Figures S6a-b show optical microscope images of Ag epoxy stamped SiN and gold electrode boundary of 50x and 200 x magnifications, respectively; and the square structure is a suspended SiN membrane window (0.5 mm x 0.5 mm). Figure S6-c shows the CV scan profile of Ag epoxy applied control device. It has two major peaks at -0.2 V, and -0.5 V during the 1 V to -1 V sweep. Then in the -1 V to 1 V) sweep, there are peaks at -0.1 and 0.8V. This is a different CV profile compared to the blank control device (Figure S7-c). Figure S6 shows similarities between -0.1 V and 0.8 V during the -1 V to 1 V sweep. In Figure S7c there is a major peak at 0.8 V in the 1 V to -1 V sweep; and there are two peaks at -0.1 V and 0.8V during -1 V to 1 V sweep. This represents a CV profile of the Ag epoxy control device inherent of the blank control device. The new peaks are due to electrochemical reaction products characteristic of Ag epoxy.

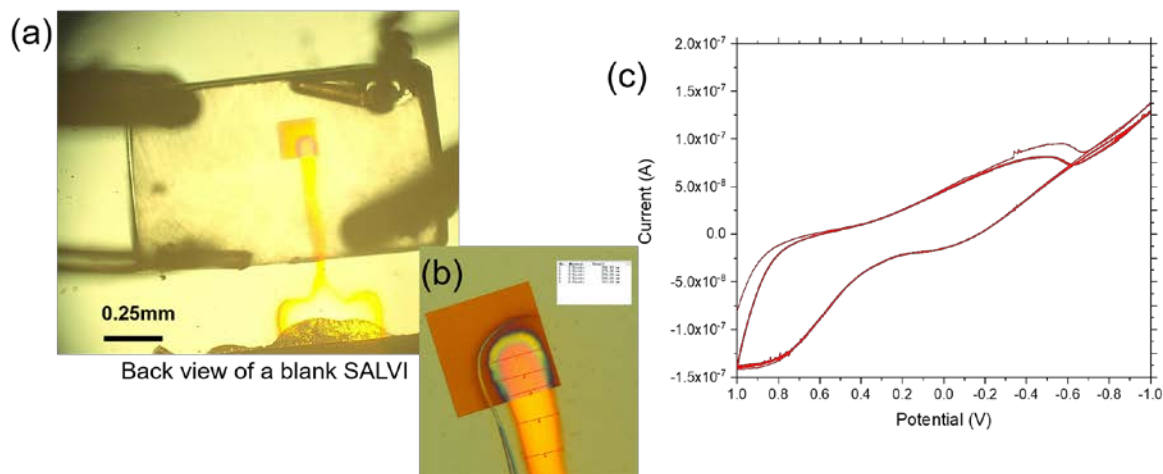

**Figure. S7.** Optical image of blank SiN membrane with Au electrode and CV scan of the blank control device of 50 x **(a)** and 200 x **(b)** magnification, and **(c)** CV scan plot.

**Figure S7c** shows CV scan profile of the blank System for Analysis at the Liquid-Vacuum Interface (SALVI) device. Peaks from this plot represent the background characteristic of the device which has similarities to [Figures 4-5](#) of the main text.

## Supplement Information

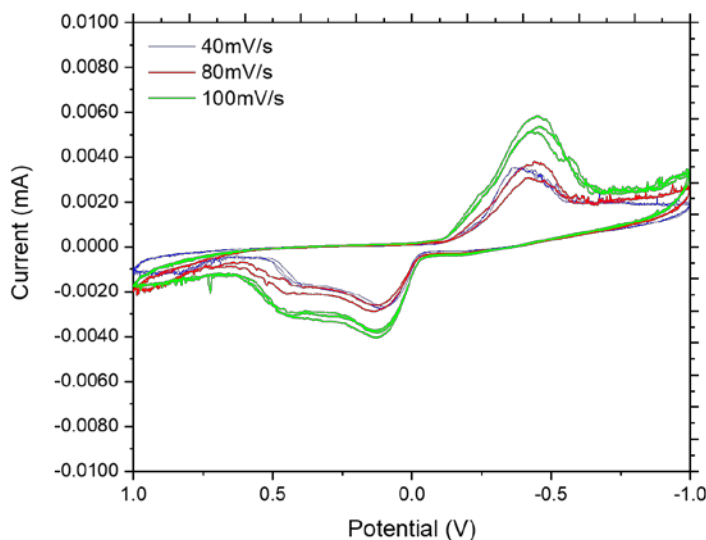

**Figure. S8.** CV scans of a sequence stamp device with different scan rates, i.e., 40 mV/s, 80 mV/s, and 100 mV/s.

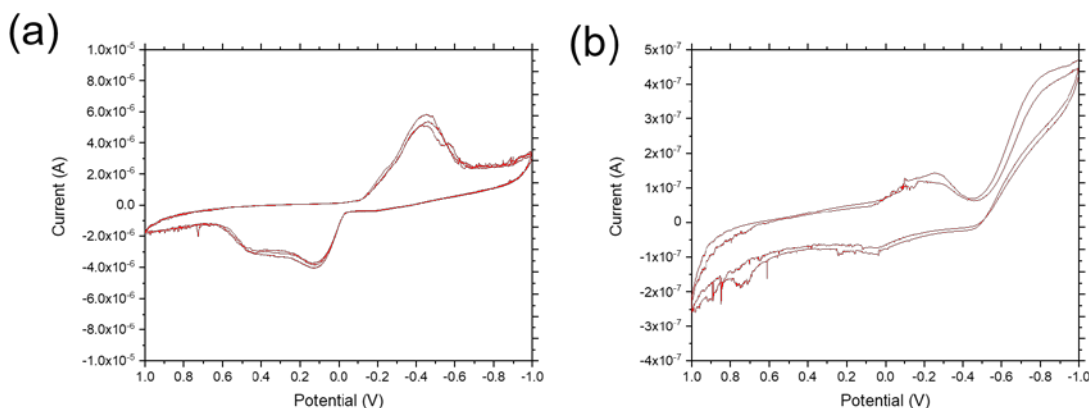

**Figure. S9.** Comparison of CV scan of the two sequence stamp devices using the scan rate of 100 mV/s: (a) the same device as shown in the main test and (b) a different device.

Figure S8 shows CV plots of the CeO<sub>2</sub> sequence stamped device using different scan rates (i.e., 40, 80, 100 mV/s) from the same device shown in Figure 4-a. Figure S9 gives a CV comparison between two CeO<sub>2</sub> sequence stamped devices with a scan rate of 100 mV/s, namely, a different device and the device from Figure 4-a. Figure S8 shows the same CV characteristics as in Figure 4-a CeO<sub>2</sub> using the sequence stamped device. Results in Figure S9-b also share similar peak characteristics as those in Figure S9-a, which is same plot as Figure 4-a. Similarity peaks are -0.4 V (sweeping from 1 V to -1 V) and 0.1V (sweeping from -1 V to 1 V). Slight noise is seen in Figure S9-b due to some impurity on the electrode surface which can be improved in future work.

## Supplement Information

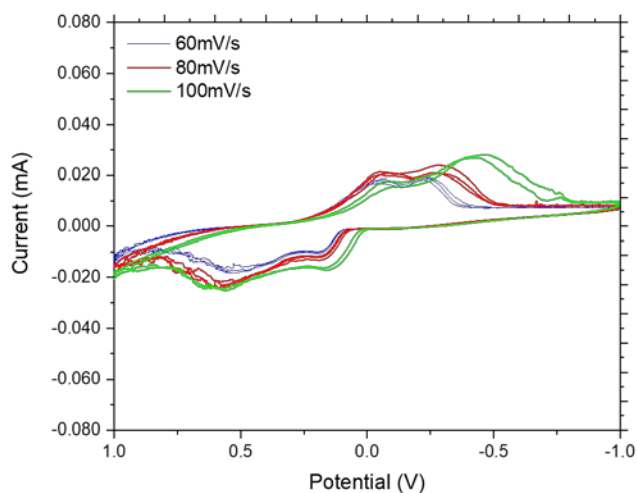

**Figure. S10.** CV scans of a mix stamp device with different scan rates, i.e., 60 mV/s, 80 mV/s, and 100 mV/s.

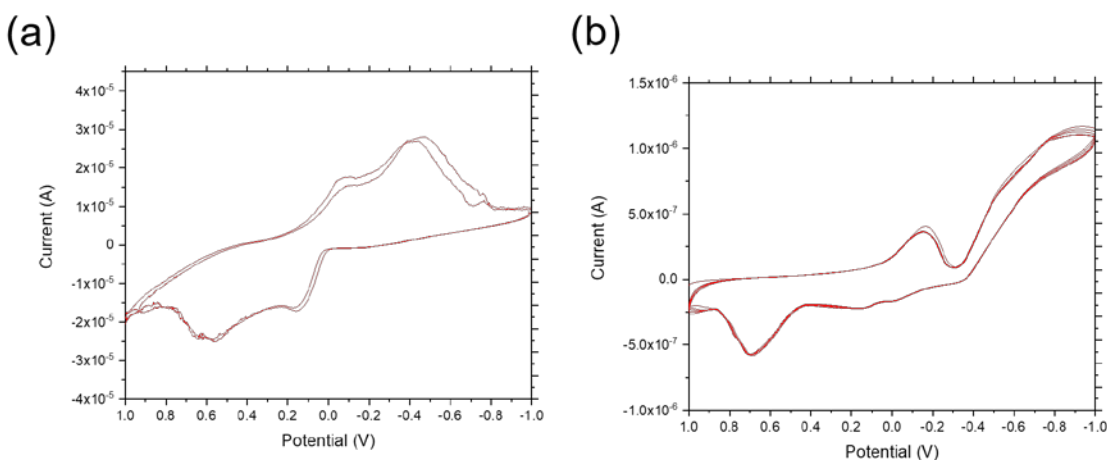

**Figure. S11.** Comparison of CV scan of the two mix stamp devices using the scan rate of 100 mV/s: (a) the same device as shown in the main test and (b) a different device.

Figure S10 shows CV plots of the  $\text{CeO}_2$  mix stamped device using different scan rates (i.e., 60, 80, 100 mV/s) from the same device shown in Figure 4-a. Figure S11-b gives a CV comparison between two  $\text{CeO}_2$  mix stamped devices with the scan rate of 100 mV/s, namely, a different device and the device from Figure 4-a. Figure S10 shows the same CV characteristics as in Figure 4-a  $\text{CeO}_2$  using the mix stamped device. Results in Figure S11-b also share similar peak characteristics as those in Figure S11-b, which is same plot as Figure 4-a. Similarity peaks are -0.1 V (sweeping from 1 V to -1 V) and 0.2 V (sweeping from -1 V to 1 V). Slight noise is seen in Figure S11-b due to some impurity on the electrode surface which can be improved in future work. Figure S11-b also shows a slight left shift of 0.55V (sweeping from -1 V to 1 V) to 0.6 V (sweeping from -1 V to 1 V), which can be explained as potential shift due to slight physical difference of nanoparticle applied electrode.

## Supplement Information

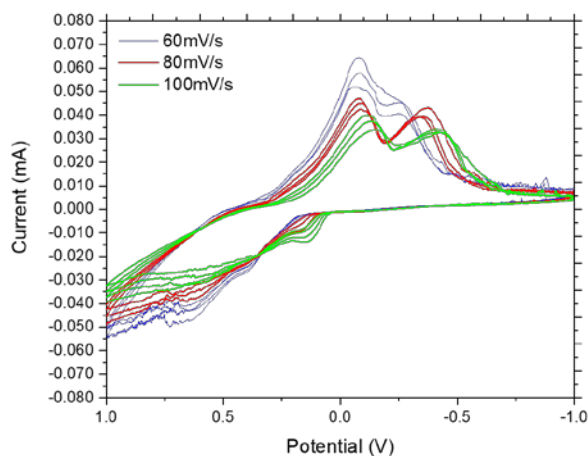

**Figure. S12.** CV scans of a droplet stamp device with different scan rates, i.e., 60 mV/s, 80 mV/s, and 100 mV/s.

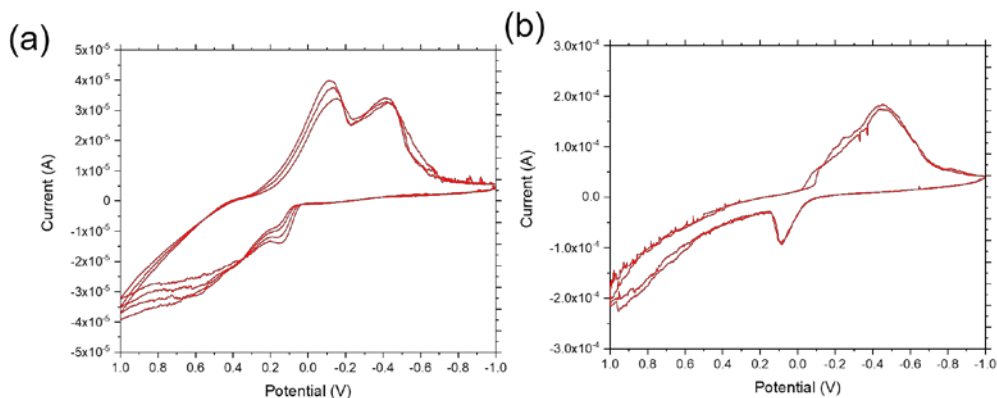

**Figure. S13.** Comparison of CV scan of the two droplet stamp devices using the scan rate of 100 mV/s: (a) the same device as shown in the main test and (b) a different device.

Figure S12 shows CV plots of the CeO<sub>2</sub> droplet stamped device using different scan rates (i.e., 60, 80, 100 mV/s) from the same device shown in Figure 4-a. Figure S13-b gives a CV comparison between two CeO<sub>2</sub> droplet stamped devices with the scan rate of 100 mV/s, namely, a different device and the device from Figure 4-a. Figure S12 shows the same CV characteristics as in Figure 4-a CeO<sub>2</sub> using the droplet stamp device. Results in Figure S13-b also share similar peak characteristics as those in Figure S4-a. Figure S13-b also shares similar characteristics with Figure S13-a. The latter is same plot from Figure 4-a. Similarity peaks are -0.12 V, -0.42 V (sweeping from 1 V to -1 V), and 0.1 V (-1 V to 1 V).

## Supplement Information

### Reference

1. Smith, T.E., S. McCrory, and M.L. Dunzik-Gougar, *Limited Oxidation of Irradiated Graphite Waste to Remove Surface Carbon-14*. Nuclear Engineering and Technology, 2013. **45**(2): p. 211-218.
2. Deslandes, A., M. Jasieniak, M. Ionescu, J.G. Shapter, C. Fairman, J.J. Gooding, D.B. Hibbert, and J.S. Quinton, *ToF-SIMS characterisation of methane- and hydrogen-plasma-modified graphite using principal component analysis*. Surface and Interface Analysis, 2009. **41**(3): p. 216-224.
